# Supplementary material
Source: Royal Society of Chemistry journal article supplement (doi:10.1039/d6cc02066f)
Supplement: d6cc02066f1.pdf [file d6cc02066f1.pdf]

## Supplementing Information

### **Strength-enhanced solid-state electrolyte polyvinyl butyral film and its electrochromic application**

**Ruize Yuan, Di Rong, Yingli Wu, Wei Wang, Yan Wang and Shiwei Wang\***

School of Chemical Engineering, Changchun University of Technology, Changchun  
130000, China.

\* Corresponding Author: [wswjdx2004@163.com](mailto:wswjdx2004@163.com)

## Experimental section

Polyvinyl butyral (PVB) was synthesized in our group, the key performance metrics are summarized in Table S1. Polymethyl methacrylate (PMMA,  $M_n = 500000$ ), Lithium perchlorate ( $\text{LiClO}_4$ ), N, N-dimethylformamide (DMF, AR) and acetone were purchased from Sigma-Aldrich Co. Ltd., Triethylene glycol di-2-ethylhexoate (3G8) was purchased from Guangdong Hongcheng Biotechnology Co. Ltd., ITO glass was purchased from Zhuhai Kaiwei Co. Ltd. All reagents were used without further purified.

## Methods

**Preparation of the Electrochromic Glasses:** 1.5 g of PVB and 0.5 g of PMMA were dissolved in the solvent mixture with 6.3 g of DMF and 4.2 g of acetone under stirring at 80 °C for 12 h. Subsequently, 0.2 g of 3G8 was added to the solution with stirring and sonicating. PVB polymer fiber films, named BA, were produced by electrospinning at a voltage of 17.5 kV, a flowing rate of 1 ml/h, and a 17 cm distance between the tip of the needle (1.36 mm diameter) and the collector for a spinning time of 2 h. The PVB fiber films were immersed in different concentrations of  $\text{LiClO}_4$  solution with concentrations for 24 h. Then the films were removed and placed in an oven at 50 °C for 12 h.

$\text{WO}_3$  and NiO thin films were deposited onto commercial ITO glass substrates via thermal evaporation using  $\text{WO}_3$  and NiO granules as sources, respectively. The deposition was carried out at a rate of 1.1 Å/s, monitored in real-time by a quartz crystal microbalance (QCM). The final thicknesses were controlled to be 500 nm for the  $\text{WO}_3$  layer and 50 nm for the NiO layer.

EC glasses with a glass/ITO/ $\text{WO}_3$ /PVB film/NiO/ITO/glass architecture were fabricated via hot pressing at  $120 \pm 1$  °C for 5 min under vacuum ( $>100$  kPa), yielding devices of  $3.0 \times 2.0$  cm<sup>2</sup> active area. The  $\text{WO}_3$  layer was uniformly deposited onto ITO substrates by thermal evaporation. These samples were labelled as BAL0 to BAL5.0, corresponding to the weight percent of  $\text{LiClO}_4$  in the impregnation solution.

**Characterization:** The morphology of samples was observed by scanning electron microscope (SEM, JSM7610F, Japan). Fourier-transform infrared (FT-IR) spectra were

recorded on an IS50 spectrometer (ThermoFisher Nicolet, USA) over wavenumbers ranging from 4000 to 400  $\text{cm}^{-1}$ . Optical transmittance spectra were obtained on a UV-vis spectrophotometer (Agilent Cary 5000, USA) within the range of 200-1000 nm. The impact resistance test of the laminated glass was observed by Falling Ball Impact Tester (SHALA-KCJ-28) with a falling ball height of 160 cm and a ball weight of 20 g. The impedance was tested by an electrochemical workstation (CHI760E, CH Instruments Ins.) with an amplitude of 10 mV and a frequency scanning range of 0.1 - 100 KHz. Cyclic voltammetry was measured by an electrochemical workstation with a sweep rate of 200 mV/s. The color change test was performed with a MAISHENG adjustable DC power supply (MS-305D). Tensile tests were carried out on a QT-6201 S bond strength testing machine at 50 mm/min.

**Table S1** key performance metrics PVB resin powder.

|            | Acetal degree<br>(%) | Hydroxyl value<br>(%) | Bulk density<br>(g/ml) | Melt flow rate<br>(g/10 min) |
|------------|----------------------|-----------------------|------------------------|------------------------------|
| PVB powder | 78.26                | 20.63                 | 0.278                  | 1.48                         |

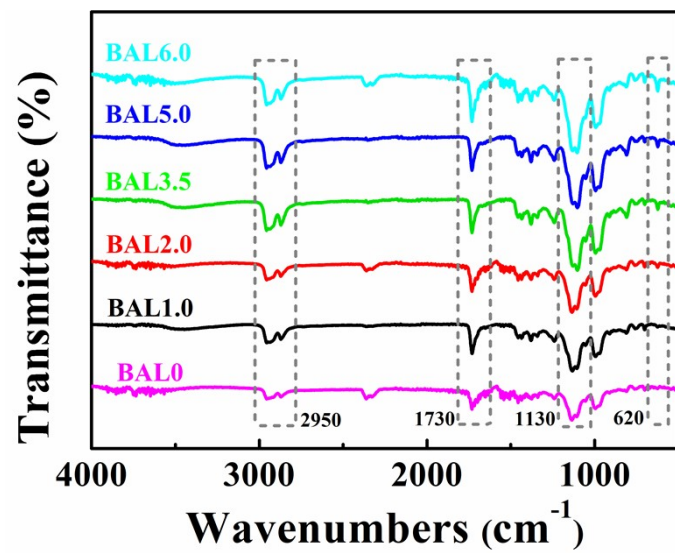

Figure S1. The FT-IR spectra of solid electrolyte film.

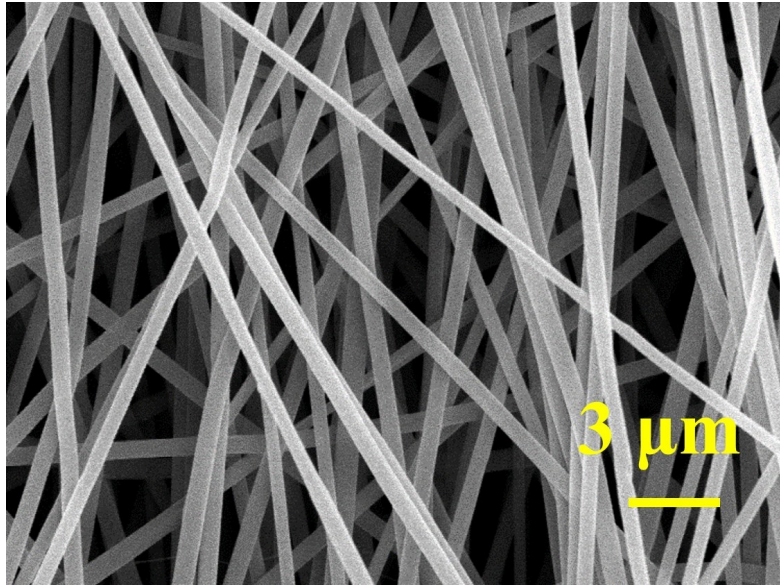

**Figure S2.** SEM images of PVB/PMMA electrolyte film.

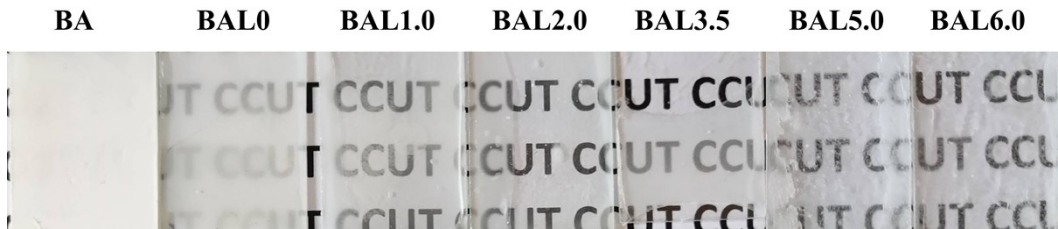

**Figure S3.** Photos of solid electrolyte polymer films.

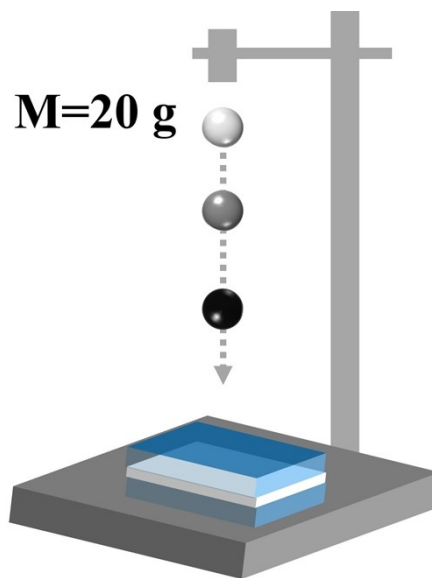

**Figure S4.** Falling ball test device.

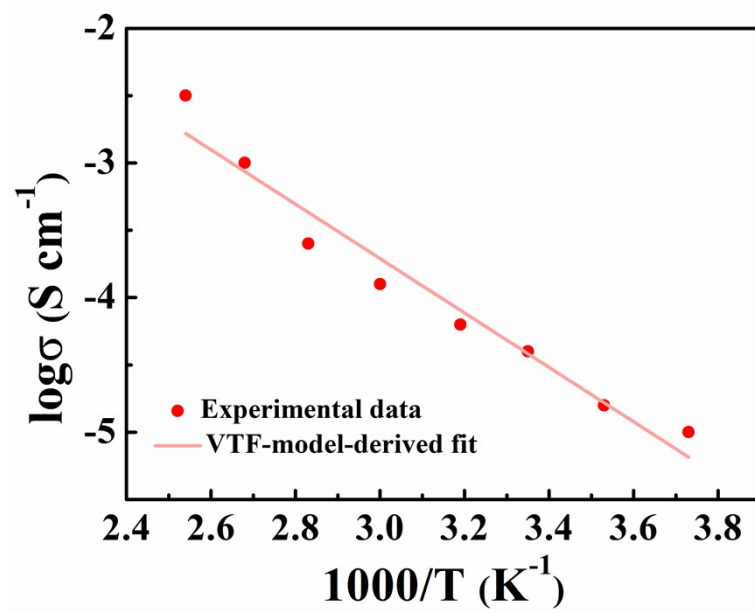

**Figure S5.** Reciprocal temperature dependence of segmental dynamics for BAL 2.0 films.

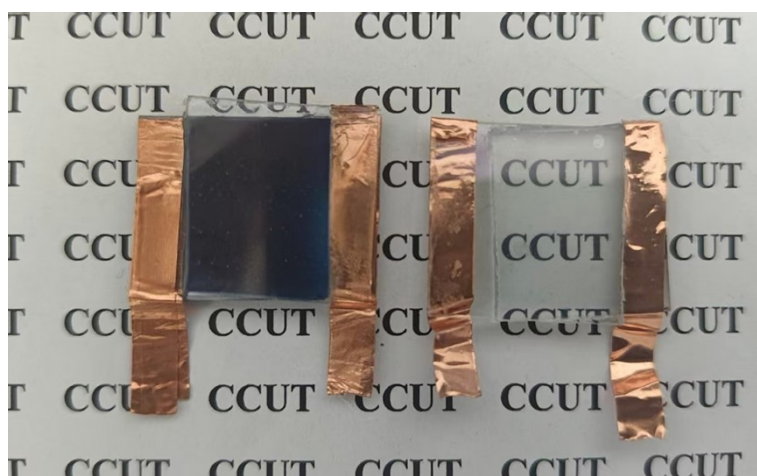

**Figure S6.** Photographs of the device in its coloured and bleached states.
